1 **N-Aryl Pyrido Cyanine derivatives: nuclear and organelle DNA markers for two-photon**  
2 **and super-resolution imaging**

3

4

5 Kakishi Uno<sup>1,2</sup>, Nagisa Sugimoto<sup>3</sup>, Yoshikatsu Sato<sup>1,3\*</sup>

6

7 <sup>1</sup>Graduate School of Science, Nagoya University, Nagoya 464-8601, Japan

8 <sup>2</sup>Present address; Department of NanoBiophotonics, Max Planck Institute for Biophysical  
9 Chemistry, Am Fassberg 11, 37077 Göttingen, Germany

10 <sup>3</sup>Institute of Transformative Bio-Molecules (WPI-ITbM), Nagoya University, Furo, Chikusa,  
11 Nagoya 464-8601, Japan

12

13 \*To whom correspondence should be addressed to Yoshikatsu Sato

14 E-mail: [sato.yoshikatsu@i.mbox.nagoya-u.ac.jp](mailto:sato.yoshikatsu@i.mbox.nagoya-u.ac.jp)

15 Phone: +81 52 789 2970

16

17

18 **Abstract**

19 Live cell imaging using DNA-binding fluorescent probes is an essential molecular tool in various  
20 biological and biomedical fields. The major challenges in currently used DNA probes are to avoid  
21 UV light photo-excitation with high DNA selectivity and cell-permeability and are the availability  
22 of the cutting-edge imaging techniques such as a super-resolution microscopy. Herein we report  
23 new orange to red fluorogenic DNA probes having N-aryl pyrido cyanine (PC) moiety as a basic  
24 skeleton. Their DNA selectivity and cell-permeabilities are so high that organelle DNA as well  
25 as nuclear DNA can be clearly stained in various cell types and plant tissues with wash-free  
26 manner. PC dyes are also compatible with a stimulated emission depletion fluorescent lifetime  
27 imaging microscopy (STED-FLIM) for super-resolution imaging as well as two-photon  
28 microscopy for deep tissue imaging, should release the utilization limitation of synthetic DNA  
29 probes.

## 30 **Introduction**

31 Synthetic fluorescent dyes for DNA stains are essential tool in current biological and  
32 biomedical science. In addition to gel electrophoresis<sup>1,2</sup>, polymerase chain reaction (PCR) in  
33 molecular biology<sup>3-5</sup>, and flow cytometry<sup>6-7</sup>, they are also greatly used in cell biological study such  
34 as for visualizing nuclear and organelle DNA<sup>8,9</sup>, cell proliferation analysis<sup>10,11</sup>, and diagnosis of  
35 virus infection<sup>12</sup>. The ideal properties for synthetic nucleus marker are i) high selectivity of DNA  
36 over RNA, ii) the applicability to long wavelength photo-excitation (>532nm)<sup>13</sup>, and iii) the ability  
37 to stain nucleus of diverse living cells and tissues. Such nucleus markers to achieve these  
38 requirements, however, has not developed yet in spite of tremendous efforts, although it has long  
39 history of developing DNA staining dye.

40 Current nucleus markers heavily rely on blue emitting Hoechst 33342<sup>14,15</sup> despite the needs of  
41 photo-toxic UV light for photo-excitation<sup>16</sup>. To overcome this drawback, Hoechst tagging strategy,  
42 which fluorescent dye excited by visible wavelength was fused to Hoechst through linker, has  
43 been reported recently<sup>17,18</sup>. Especially, silicon-rhodamine (Sir)-Hoechst, which fused a far-red  
44 emissive Sir to Hoechst 33342, stained nucleus with no significant photo-toxicity and showed  
45 compatibility with stimulated emission depletion (STED) nanoscopy<sup>18,19</sup>. In exchange for these  
46 preferable properties, however, the high DNA-binding strength of Hoechst has been lost by fusing  
47 Sir and the increase of molecular weight is inevitable in the Hoechst tagging strategy which are  
48 considered disadvantage for cell permeability.

49 On the other hand, unsymmetrical cyanine fluorescent dyes, such as SYBR-Green<sup>20</sup>, Pico-  
50 Green<sup>21</sup>, TO-PRO-1/TOTO<sup>22,23</sup>, TO-PRO-3/TOTO-3<sup>23-25</sup>, are also the most widely used  
51 DNA/nucleus markers. The most remarkable properties represent their high fluorescence jump  
52 upon binding nucleic acid and availability of visible wavelength light for their excitation<sup>22-24,26</sup>.  
53 Out of all of unsymmetrical cyanine dyes, SYBR-Green and Pico-Green have a favorable  
54 character unlike Hoechst that can stain mitochondrial DNA (mt-DNA)<sup>9,27-30</sup> as well as nuclear  
55 DNA<sup>31,32</sup> in living cells. Unfortunately, however, these dyes are mostly excited with photo-toxic

56 short wavelength laser such as 488 nm<sup>13</sup> and do not have high DNA selectivity over RNA<sup>25,33</sup>.  
57 The excitation/emission wavelength in these monomethine cyanine dyes can be easily red-  
58 shifted by extending  $\pi$ -conjugation to synthesize trimethine dyes. The thus obtained red-shifted  
59 dyes, however, showed low fluorescence jump upon DNA binding and needed high  
60 concentration to stain cell nucleus in fixed cells<sup>34</sup>. So far, fluorescent DNA marker which fulfills  
61 above all requirements is still awaited.

62 To this end, in the present study, we synthesized unprecedented series of symmetrical  
63 cyanine DNA markers based on N-aryl pyrido cyanine (PC). The produced novel N-aryl PC  
64 dyes provided expanded options of excitation wavelength with the exceptional DNA/RNA  
65 selectivity. In addition to these great properties, N-aryl PC dyes has an outstanding cell  
66 permeability to clearly stain nuclear and mt-DNA in concentration dependent manner in various  
67 cell types. Therefore, here we demonstrated their versatile abilities for various optical  
68 microscopies such as two-photon excitation microscopy (2PEM), FLIM, and STED-FLIM  
69 nanoscopy.

70

## 71 **Results**

### 72 **Molecular design and in vitro characterization of N-aryl PC derivatives.**

73 To achieve long absorption DNA selective markers with a small-molecule fluorophore, we  
74 envisioned that PC derivatives could give an advantage for making longer wavelength excitable  
75 dyes since PC has an extended  $\pi$ -conjugation with a monomethine cyanine unit<sup>35,36</sup>. Firstly, we  
76 designed and synthesized N-Phenyl Pyrido Cyanine (**PC1**) (**Fig. 1a**). UV-Vis and fluorescence  
77 spectra measurements revealed that the maximum absorption wavelength of free **PC1** was 510  
78 nm and it was red-shifted to 532 nm when binding upon DNA (**Table 1, Fig. S1a**), which are  
79 effectively longer than those in previously reported unsymmetrical monomethine dyes (460-520  
80 nm)<sup>20-23</sup>. When fluorogenic properties ( $I^{\text{dsDNA}}/I^{\text{free}}$  or  $I^{\text{RNA}}/I^{\text{free}}$ ) of **PC1** on binding to nucleic acids  
81 (DNA and RNA) were evaluated, it was extremely high and jumped 1600-fold upon binding  
82 DNA (**Table 1, Fig. S2a**). On the other hand, favorably for DNA selective property, the  
83 fluorogenicity ( $I^{\text{RNA}}/I^{\text{free}}$ ) was only up to 110-fold upon binding to RNA. Actually, the value of  
84 DNA/RNA selectivity ( $I^{\text{dsDNA/RNA}}$ ) of **PC1**, which calculated by dividing  $I^{\text{dsDNA}}$  by  $I^{\text{RNA}}$ , was  
85 extremely higher than that of most popular commercialized nucleus probes, Hoechst 33342<sup>14</sup>  
86 (**Fig. S2i**) and Pico-Green<sup>21</sup> (**Fig. S2j**). To know the nucleotide sequence specificity of **PC1**, we  
87 performed fluorescence titration with three hairpin oligonucleotides ( $^{\text{AATT}}$ DNA,  $^{\text{CGCG}}$ DNA,  
88  $^{\text{AAUU}}$ RNA)<sup>18,37</sup> and found that **PC1** preferentially binds to  $^{\text{AATT}}$ DNA, while no noticeable bindings  
89 to  $^{\text{CGCG}}$ DNA and  $^{\text{AAUU}}$ RNA (**Fig. 1c, Fig. S3**). These results suggest that **PC1** specifically bind to  
90 AT base-pair of nucleic acids. For tuning toward further optical red-shift, we also synthesized  
91 N-aryl PC dye derivatives by replacing N-phenyl group to electron donating N-aryl groups<sup>38</sup>  
92 such as anisole (**PC2**), N,N-dimethylaniline (**PC3**), and N,N-diethylaniline (**PC4**) (**Fig. 1d**). It  
93 should be noted that despite the structural modifications, exceptional DNA/RNA selectivity and  
94 high DNA-based fluorogenic properties are not impaired by these structural modifications  
95 (**Table1, Fig. S1 and S2**). Furthermore, we synthesized additional four trimethine PC dyes  
96 which possess N-Phenyl (**PC5**), N,N-dimethylaniline (**PC6**), N,N-diethylaniline (**PC7**) and 1-

97 methyl-4-phenylpiperazine (**PC8**) which possess extended the  $\pi$ -conjugation of methylene chain  
98 (**Fig. 1d**). In these deep-red and far-red emissive dyes, comparable DNA/RNA selectivity were  
99 remained, although the fluorogenicity ( $I^{\text{dsDNA}}/I^{\text{free}}$ ) were lower than that in monomethine PC  
100 dyes. Thus, we succeeded to synthesize the new series of PC based symmetrical cyanine DNA  
101 probes providing researchers with expanded options of excitation wavelength from 500-700 nm  
102 (**Fig. 1e-f**).

103

#### 104 **Applicability of N-aryl PC dyes in various living-cell types.**

105 To test the utility of N-aryl PC dyes for nucleus marker, we stained HeLa cells with all synthesized  
106 PC dyes at 1  $\mu\text{M}$  concentration and found that they are capable of labeling nuclear DNA by  
107 confocal laser scanning microscopy (CLSM) (**Fig. S4**). As representative case study, we also  
108 confirmed that **PC1** and **PC3** specifically bind AT pairs in nucleus by co-staining with Hoechst  
109 33342 which is well known to bind minor groove of AT-rich sequences<sup>37</sup> (**Fig. S5**). Consequently,  
110 these N-aryl PC dyes are excluded from nucleus by Hoechst 33342 in dose dependent manner.  
111 These results indicate that they scramble for AT pairs sequences with Hoechst and are consistent  
112 with in vitro study using hairpin oligonucleotides (**Fig. 1c, Fig. S3**). The talented ability of N-aryl  
113 PC dyes for selective DNA stain without washing process was obvious when compared with  
114 commercially available cell permeable SYTO dyes, which have similar excitation and emission  
115 spectrum. **PC1** and **PC3** clearly stain nucleus and chromosome with no substantial background  
116 from cytosol, whereas SYTO dyes failed to stain nucleus even at higher concentration and they  
117 rather stained cytosol and nucleolus which have a large amount of RNA (**Fig. 2a, Fig. S6**).  
118 Moreover, cell proliferation analysis as well as its time lapse imaging revealed that **PC1** and **PC3**  
119 showed no substantial cytotoxicity and photo-toxicity compared with those of SYTO dyes (**Fig.**  
120 **2b**). The applicability of **PC1** and **PC3** was also investigated to other mammalian cell types (U-  
121 2OS, C6, NIH3T3) and found that they could uniformly stain nuclear DNA without any reagent  
122 for facilitating cell permeability (**Fig. 2c**). Considering that SiR-Hoechst needs voltage-

123 dependent calcium channel inhibitor, verapamil, for homogeneous staining of nuclear DNA in U-  
124 2OS cells<sup>18</sup>, these results indicate that cell permeability of N-aryl PC dyes is substantially higher  
125 than that of SiR-Hoechst. Then, we investigated the applicability of N-aryl PC dyes to stain  
126 nucleus in plant tissue which are composed of cells stacking with thick cell wall in layers, and  
127 succeeded in this challenge using Arabidopsis leaf and root tissues (**Fig. 2d**). In addition to the  
128 epidermal cells including stomata, mesophyll cells underneath epidermis were perfectly stained  
129 in the nucleus in leaf tissue without the washing process (**Movie S1** and **S2**). On the other hand,  
130 time-lapse analysis revealed that root hairs as well as main root tissue grew normally and were  
131 also clearly stained in their nucleus by **PC1** (**Movie S3**). We next employed 2PEM excited with  
132 1000 nm to investigate the dye penetration in the main root. Consequently, 2PEM enabled to  
133 observe whole nuclei of root tip region by overall cross sections ( $\sim 100 \mu\text{m}$ ) while CLSM limited  
134 to visualize only the half cross sections ( $\sim 50 \mu\text{m}$ ) (**Fig. 2e**, **Movie S4**). Furthermore, we did not  
135 detect any cytotoxicity and photo-toxicity during the study of plant cells stained by PC dyes and  
136 cell division with root growth was frequently observed by 2PEM time-lapse imaging (**Fig. 2f**,  
137 **Movie S5**). These results indicate that the PC dyes penetrated deep into the root layer with no  
138 apparent toxicity and are very suitable for 2PEM possibly because of the symmetrical donor-  
139 acceptor-donor molecule<sup>39</sup>.

140

#### 141 **Discrimination between nuclear DNA and organellar DNA with fluorescence lifetime of N-** 142 **aryl PC dyes.**

143 During the exploration of the minimized concentration for N-aryl PC dyes, we found that **PC1**  
144 obviously stained nucleus with very low cytoplasmic background even at only 10 nM (**Fig. 3a**).  
145 In contrast, many cytoplasmic spots as well as nucleus were also observed at 1 nM and the signal  
146 from the spots instead from nucleus became predominant by further dilution at 100 pM (**Fig. 3b**  
147 and **3c**). In our previous study, the similar changes of staining pattern were observed using SYBR-  
148 Green which stained not only nucleus but mitochondrial nucleoids (mt-nucleoids), the core

149 complexes of mitochondrial DNA (mt-DNA) replication and transcription<sup>30</sup>. We also confirmed  
150 that the fluorescence spots resided in mitochondria by co-staining of **PC1** and MitoTracker (**Fig.**  
151 **S7**). These results indicate that **PC1** enables to clearly stain mt-DNA as well as nuclear DNA in  
152 dose dependent manner. Furthermore, we found that the fluorescent lifetime of **PC1** in nucleus  
153 (~ 1.1 ns) was substantially longer than that in mt-nucleoids (~ 0.5 ns) and they were clearly  
154 discriminated with different pseudo colors using FLIM combined with phasor plot analysis in  
155 various cell types (**Fig. 3d-I**). Similar results were obtained in the **PC3** stained cells (**Fig. S8**).  
156 Furthermore, plant cells stained with **PC1** were also applied to extend the concept of FLIM based  
157 separation. We envisioned that **PC1** could also distinguish chloroplast DNA (ch-DNA), another  
158 organelle having own genome, from mt-DNA and nuclear DNA if the fluorescent lifetime of **PC1**  
159 in chloroplasts was quite different from that in mt-DNA and nuclear DNA. Then, we employed  
160 FLIM analysis of **PC1** in living stomata of Arabidopsis (**Fig. 3k, Movie S6**). Consequently, the  
161 **PC1** in chloroplasts (yellow) had an intermediate fluorescence lifetime (~0.9 ns) compared with  
162 that in mitochondria (cyan) and in nucleus (red) and they could be displayed with different pseudo  
163 colors. Therefore, FLIM analysis stood out the talented ability of PC dyes and we successfully  
164 demonstrated that **PC1** achieved to discern all three DNA storages (nucleus, mitochondria,  
165 plastid) in eukaryote without any help of other fluorescent probes.

166

#### 167 **Applicability of PC dyes for Live-cell STED-FLIM nanoscopy.**

168 Since maintenance of mt-nucleoid is essential for proper mt-DNA segregation and replication<sup>40,41</sup>,  
169 probes directly staining mt-DNA as well as nuclear DNA is very effective tool for mitochondrial  
170 biomedical research. As far as we know, useful probes compatible with live cell super-resolution  
171 microscopy, however, have not been reported till now in spite of great needs for elucidating mt-  
172 nucleoids of which their size are less than a diffraction limit<sup>42,43</sup>. Therefore, we assessed the  
173 compatibility of PC dyes to STED-FLIM nanoscopy and finally found that **PC3** was a promising  
174 PC dye. HeLa cells stained with 10 nM **PC3** were excited with 561 nm with or without 660 nm



175 STED laser by sequential imaging using between lines. Super-resolution images were obtained  
176 by two component separations of STED-FLIM image using n-exponential reconvolution model  
177 (**Fig. 4b**). Comparable results were also obtained not only in living NIH/3T3 cells but also in  
178 plant cells (**Fig. S9** and **S10**). Then, we also calculated a full width at half maximum (FWHM) of  
179 minor axis of mt-nucleoids to estimate the size of mt-nucleoids in HeLa cells (**Fig. 4c**). The  
180 FWHM value was  $100\pm 9$  nm at 3 ns of delay time, which is good agreement with the previous  
181 study<sup>44</sup>. Taken together, **PC3** is a unique DNA probe which has a great compatibility with STED  
182 nanoscopy in various cell types.  
183

184 **Discussion.**

185 In this study, we developed new series of DNA markers based on N-aryl pyrido cyanine (PC)  
186 to fulfill all three required properties described above. Firstly, we actualized that all N-aryl PC  
187 dyes were applicable to long wavelength excitation over 532 nm as planned. This achievement is  
188 due to our molecular design focusing on PC<sup>35</sup>, possessing an extended  $\pi$ -conjugation with a  
189 monomethine cyanine unit compared with hitherto unsymmetrical cyanine dyes such as SYBR-  
190 Green and Pico-Green. Secondly, fortunately, all eight PC dyes including trimethine dyes have  
191 high DNA selectivity and are capable of staining nucleus. Among them, **PC1** and **PC3** have an  
192 unexpectedly great property of DNA sequence selectivity at AT-pairs rich region and a high  
193 fluorogenic property upon binding DNA, succeeding in staining nuclear DNA at very low  
194 concentration. And thirdly, these dyes exhibited extremely high cell and tissue permeability to  
195 stain nuclear DNA in various cell types. Especially in **PC1** stained plant root, 2PEM revealed  
196 whole nuclei without apparent toxicity in root growth and cell division.

197 We also succeeded to bring out other key potentials of PC dyes except for basic ideal  
198 properties described above. We found that these PC dyes obviously stained mt-DNA at  
199 ultralow concentration and also labelled both mt-DNA and nuclear DNA by optimizing the  
200 staining dye concentration. Since the synthetic probes for mt-DNA have been limited to  
201 staining DAPI<sup>45</sup>, SYBR-Green<sup>9,27</sup>, and Pico-Green<sup>28</sup>, our red fluorescent PC dyes will provide  
202 researchers with new channel. More importantly, taking advantage of this character, we also  
203 successfully applied FLIM into mammalian cells for discrimination between mt-DNA and  
204 nuclear DNA and into plant cells for separation with ch-DNA as well as mt-DNA and nuclear  
205 DNA by itself. Furthermore, we demonstrated that at least one PC dye (**PC3**) were applicable  
206 to STED-FLIM nanoscopy. Our dye will be useful for the biology field in mt-nucleoid as well  
207 as nuclear chromatin dynamics. Recently, dynamic structure of mitochondrial cristae has been  
208 visualized by STED nanoscopy<sup>46, 47</sup>. In regards to the dynamic structural relationship between  
209 mt-nucleoid and mitochondrial cristae, however, dual STED imaging has not been reached yet

210 since PicoGreen which stains mt-nucleoids were not be applied to STED nanoscopy while super-  
211 resolution of cristae was perfectly performed using SNAP-Cell Sir labeling system in COX8A-  
212 SNAP expressed cells<sup>46</sup>. We believe that N-aryl PC dyes should enable the challenging study. Last  
213 of all, together with these outstanding characters and talented applicability to various microscope  
214 techniques, our PC dyes have both the best of Hoechst and Pico-Green. Although we here did not  
215 validate the effectiveness, we also believe that PC dyes would be also useful tools for molecular  
216 biology such as real-time PCR and fluorescent cytometry.

217 **Methods**

218 **Binging of Hair-pin DNA and RNA Oligonucleotides.** For the oligo-nucleotides binding studies,  
219 synthetic DNA oligonucleotides, 5'-CGCGAATTCGCGTTTTTCGCGAATTCGCG-3' (28 bp)  
220 and 5'-CGCGCCGGCGCGTTTTTCGCGCCGGCGCG-3' (28 bp) were purchased by eurofins,  
221 whereas RNA 5'-CGCGAAUUCGCGUUUUCGCGAAUUCGCG-3' (28 bp) was obtained from  
222 FASMAC. Each oligonucleotide was dissolved in 1× TBS buffer (50 mM Tris HCl, 150 mM  
223 NaCl, pH 7.4) at 200  $\mu$ M concentration and adjusted various concentrations by serial dilution  
224 with TBS. These oligonucleotide solutions were heated at 95°C for 1 min followed by cooling  
225 down at room temperature. On the other hand, each PC dye was dissolved in TBS with 2 mg/mL  
226 BSA at 200 nM concentration. The fluorescent intensity of equal amount mixture of  
227 oligonucleotide and PC dye solution was measured by EnSpire (PerkinElmer).

228

229 **Animal and plant cell cultures for fluorescence imaging.** Cell culture lines (HeLa, U-2OS, C6,  
230 NIH3T3) were cultured in Dulbecco's modified Eagle's medium (DMEM, Wako) containing  
231 10% fetal bovine serum at 37 °C in a 5% CO<sub>2</sub>/95% air incubator. These lines (2 × 10<sup>4</sup> cells  
232 /mL) were transferred on each well of a glass-bottom 8-well slide and cultured 1day before  
233 imaging. DNA staining was performed in DMEM (-) containing 10 mM HEPES (pH 7.4)  
234 without washing. The *Arabidopsis thaliana* wild-type (Col-0) was also used. After keeping at  
235 4°C for 3 days on Murashige and Skoog medium, seeds were cultured under continuous white  
236 light at 22–23°C for germination and cultured for 11-12 days.

237

238 **Fluorescent titration.** Calf thymus double stranded DNA (dsDNA), purchased from Sigma-  
239 Aldrich Co, and Ribonucleic acid from torula yeast (RNA), purchased from Wako Pure Chemical  
240 Industries, were used in the fluorescence titration<sup>48,49</sup>. DNA/RNA selectivity of **PC1** was  
241 compared with commercialized nucleus markers (Pico-Green, Hoechst 33342; ThermoFisher  
242 Scientific). All chemicals are used without additional treatment or further purifications. UV/Vis

243 absorption spectra were recorded on a Shimadzu UV-3510 spectrometer with a resolution of 0.5  
244 nm and emission spectra were measured with an FP-6600 Hitachi spectrometer with a resolution  
245 of 0.2 nm. Circular dichroism spectra were measured with a JASCO FT/IR6100. 1.0 cm square  
246 quartz cell was used for all optical measurements. 1.0 g/L dsDNA solution (1.0 mL) or 2.0 g/L  
247 RNA solution (1.0 mL) were added to dye solutions (2.0 mL) with absorbance around 0.2 at each  
248 maximum wavelength at room temperature by using a micro pipet. After titration, the combined  
249 solution was gently shaken several times to stabilize the absorbance and fluorescence intensities  
250 of all samples. (see detailed results in the supporting information)

251

252 **Wide-field microscopy.** For assessment of cytotoxicity and photo-toxicity of PC dyes, we also  
253 used commercialized red fluorescence nucleus markers (SYTO 80, SYTO 82, SYTO 84;  
254 ThermoFisher Scientific). The time-lapse observation was performed by an inverted microscope  
255 system (IX-71; Olympus) equipped with an UPlanSApo IR 20x/0.75 objective lens (Olympus),  
256 and a CMOS camera (ORCA Flash 4.0 V3 C13440; Hamamatsu photonics). The TRITC-A-Basic  
257 fluorescent filter set (FF01-542/20, FF570-Di01, FF01-620/52; Semrock Inc.) was used for all  
258 nucleus markers. The stage incubator system (Tokai Hit Co, Ltd.) was used to keep temperature  
259 at 37 °C and 5% CO<sub>2</sub>/95% air condition. The fluorescence and bright -field time lapse images  
260 were taken with or without excitation and cell proliferation rate was assessed by visual inspection  
261 from bright-field time-lapse images.

262

263 **Confocal microscopy.** A confocal laser scanning microscopy system (TCS-SP8 FALCON  
264 gSTED; Leica) equipped with a pulsed white light laser (WLL; 80 MHz) and a HyD detector was  
265 used for fluorescence imaging of nuclear DNA in various animal cultured cells at 37 °C in a 5%  
266 CO<sub>2</sub>/95% air condition (Fig. 2a and 2c). For low and high magnification observation, HC PL  
267 APO CS2 20x/0.75 and HC PL APO CS2 100x/1.40 oil objective were used, respectively. Cells  
268 stained with **PC1** or SYTO 80 were excited with a 532 nm and their emission was collected at

269 540 - 670 nm. Cells stained with **PC3** were excited with a 552 nm or a 561 nm and their emission  
270 was collected at 560 – 670 nm or 570-670 nm. When stained at ultralow concentration (100 pM),  
271 cells were excited with 561 nm and their emission was detected at 570-769 nm. Cells stained with  
272 SYTO 82 were excited with a 543 nm and their emission was detected at 550-670 nm. Cells  
273 stained with SYTO 84 were excited with a 561 nm and their emission was detected at 570-670  
274 nm. Gated detection between 0.1-12 ns was performed for all fluorescence imaging. A confocal  
275 microscope system (LSM 780; Zeiss) equipped with a 20×/0.8 Plan-Apochromat lens and 32-  
276 channel gallium arsenide phosphide (GaASP) detector array was used for Arabidopsis leaf and  
277 root imaging. Cells stained with **PC1** were excited with a 514 nm and their fluorescence were  
278 collected at 517-614 nm in leaf cells and 517-693 nm in root cells, respectively. Cells stained with  
279 **PC3** were excited with a 560 nm and their fluorescence were collected at 561-605 nm in leaf cells  
280 and 570-693 nm in root cells, respectively. In leaf cell imaging, chlorophyll autofluorescence was  
281 also detected at 675-693 nm. Collected images were further processed using open-source software  
282 Image J (<http://imagej.nih.gov/ij/>).

283

284 **Two-photon excitation microscopy.** Two-photon imaging was performed using a laser scanning  
285 microscope (LSM-780; Zeiss) equipped with a widely tunable Ti: Sapphire femtosecond pulse  
286 laser (Chameleon; Coherent) and LD C-Apochromat 40×/1.1 water immersion lens. The same  
287 Arabidopsis root stained with **PC1** were excited with 1000 nm as well as 488 nm and their  
288 fluorescence were detected at 500-690 nm and 490-596 nm, respectively.

289

#### 290 **FLIM and STED-FLIM microscopy**

291 A confocal laser scanning microscopy system (TCS-SP8 FALCON gSTED ; Leica) equipped with  
292 a pulsed white light laser (WLL; 80 MHz), 660 STED laser, HC PL APO CS2 100×/1.40 oil  
293 objective lens, and a HyD detector was used for fluorescence imaging of nuclear and  
294 mitochondrial DNA in various animal cultured cells at 37°C in a 5% CO<sub>2</sub>/95% air condition (Fig.

295 4a-i). For observation of Arabidopsis stomata, HC PL APO CS2 93×/1.30 GLYC objective lens  
296 was used and z-sectioning image was obtained from 26 frames at 0.26  $\mu\text{m}$  steps. For STED-FLIM  
297 imaging, cells were excited with 561 nm and their emission was corrected at 570 – 650 nm with  
298 or without 660 nm STED laser. STED image was obtained by separation of a FLIM image to two  
299 exponential components thorough n-exponential reconvolution model or  $\tau$ -STED function.  
300 Confocal and STED imaging were acquired alternately between lines. Fluorescent life time based  
301 separation images were displayed with different pseudo colors by phaser plot analysis<sup>50</sup>. Collected  
302 images were deconvoluted by default setting of Huygens; signal-to-noise ratio and quality  
303 threshold were set to 7 and 0.05 for STED images, 20 and 0.05 for conventional CLSM images,  
304 respectively. Images were further processed using ImageJ. Full-width-half-maximum (FWHM)  
305 was estimated by fitting with a Gaussian function described before<sup>47</sup>.

306

307

308

309 **References**

- 310 1. Tiselius, A. A new apparatus for electrophoretic analysis of colloidal mixtures. *Trans. Faraday*  
311 *Soc.* **33**, 524-531 (1937).
- 312 2. Sigmon, J. & Larcom, L. L. The effect of ethidium bromide on mobility of DNA fragments  
313 in agarose gel electrophoresis. *Electrophoresis* **17**, 1524-1527 (1996).
- 314 3. Bengtsson, M. Karlsson, H. J. Westman, G. & Kubista, M. A new minor groove binding  
315 asymmetric cyanine reporter dye for real-time PCR. *Nucleic Acids Res.* **31**, e45 (2003).
- 316 4. Higuchi, R. Dollinger, G. Walsh, P. S. & Griffith, R. Simultaneous amplification and detection  
317 of specific DNA sequences. *Biotechnology* **10**, 413-417 (1992).
- 318 5. Higuchi, R. Fockler, C. Dollinger, G. & Watson, R. Kinetic PCR analysis: real-time  
319 monitoring of DNA amplification reactions. *Biotechnology* **11**, 1026-1030 (1993).
- 320 6. Riccardi, C. & Nicoletti, I. Analysis of apoptosis by propidium iodide staining and flow  
321 cytometry. *Nat. Protoc.* **1**, 1458-1461 (2006).
- 322 7. Hirons, G. T. Fawcett, J. J. & Crissman, H. A. TOTO and YOYO: new very bright  
323 fluorochromes for DNA content analyses by flow cytometry. *Cytometry* **15**, 129-140 (1994).
- 324 8. Hayashi, J.-I. Takemitsu, M. Goto, Y.-I. & Nonaka, I. Human mitochondria and mitochondrial  
325 genome function as a single dynamic cellular unit. *J. Cell Biol.* **125**, 43-50 (1994).
- 326 9. Nishimura, Y. Higashiyama, T. Suzuki L. Misumi O. & Kuroiwa T The biparental  
327 transmission of the mitochondrial genome in *Chlamydomonas Reinhardtii* visualized in living  
328 cells *Eur. J. Cell Biol.* **77**, 124-133 (1998).
- 329 10. Salic, A. & Mitchison, T. J. A chemical method for fast and sensitive detection of DNA  
330 synthesis in vivo. *Proc. Natl Acad. Sci. USA* **105**, 2415-2420 (2008).
- 331 11. Richards, W. L. et al. Measurement of cell proliferation in microculture using Hoechst 33342  
332 for the rapid semiautomated micro fluorimetric determination of chromatin DNA. *Exp. Cell*  
333 *Res.* **159**, 235-246 (1985).



- 334 12.Ferri, K. F. et al. Apoptosis control in syncytia induced by the HIV type 1-envelope  
335 glycoprotein complex: role of mitochondria and caspases. *J. Exp. Med.* **192**, 1081-1092 (2000).
- 336 13.Wäldchen, S. Lehmann, J. Klein, T. van de Linde, S. & Sauer, M. Light-induced cell damage  
337 in live-cell super-resolution microscopy. *Sci. Rep.* **5**, 15348 (2015).
- 338 14.Latt, S. A. & Stetten, G. Spectral studies on 33258 Hoechst and related bisbenzimidazole dyes  
339 useful for fluorescent detection of deoxyribonucleic acid synthesis. *J. Histochem. Cytochem.*  
340 **24**, 24-33 (1976).
- 341 15.Bucevičius, J. Lukinavičius, G & Gerasimaitė, R. The use of Hoechst dyes for DNA staining  
342 and beyond. *Chemosensors* **6**, 18 (2018).
- 343 16.Durand, R. E. & Olive, P. L. Cytotoxicity, mutagenicity and DNA damage by Hoechst 33342.  
344 *J. Histochem. Cytochem.* **30**, 111-116 (1982).
- 345 17.Nakamura, A. et al. Hoechst tagging: a modular strategy to design synthetic fluorescent probes  
346 for live-cell nucleus imaging. *Chem. Commun.* **50**, 6149-6152 (2014).
- 347 18.Lukinavičius, G. et al. SiR-Hoechst is a far-red DNA stain for live-cell nanoscopy. *Nat.*  
348 *Commun.* **6**, 8497 (2015).
- 349 19.Legant, W. R. et al. High-density three-dimensional localization microscopy across large  
350 volumes. *Nat. Methods* **13**, 359-365 (2016).
- 351 20.Jin, X. Yue, S. Wells, K. S. & Singer, V. L. SYBR Green I: a new fluorescent dye optimized  
352 for detection of picogram amounts of DNA in gels. *Biophys. J.* **66**, A159 (1994).
- 353 21.Ahn, S. J. Costa, J. & Emanuel, J. R. PicoGreen quantitation of DNA: effective evaluation of  
354 samples pre- or post-PCR. *Nucleic Acids Res.* **24**, 2623-2625 (1996).
- 355 22.Rye, H. S. et al. Stable fluorescent complexes of double-stranded DNA with bis-intercalating  
356 asymmetric cyanine dyes: properties and applications. *Nucleic Acids Res.* **20**, 2803-2812  
357 (1992).
- 358 23.Netzel, T. L. Nafisi, K. Zhao, M. Lenhard, J. R. & Johnson, I. Base-content dependence of  
359 emission enhancements, quantum yields, and lifetimes for cyanine dyes bound to double-

- 360 strand DNA: photophysical properties of monomeric and bichromophoric DNA Stains. *J.*  
361 *Phys. Chem.* **99**, 17936-17947 (1995).
- 362 24.Sovenyhazy, K. M. Bordelon, J. A. & Petty, J. T. Spectroscopic studies of the multiple binding  
363 modes of a trimethine-bridged cyanine dye with DNA. *Nucleic Acids Res.* **31**, 2561-2569  
364 (2003).
- 365 25.Suzuki, T. Fujikura, K. Higashiyama, T. & Takata, K. DNA staining for fluorescence and laser  
366 confocal microscopy. *J. Histochem. Cytochem.* **45**, 49-53 (1997).
- 367 26.Johnson, I. & Spence, M. T. Z. The molecular probes handbook: a guide to fluorescent probes  
368 and labeling technologies (11th ed.). Eugene, Oregon: Life Technologies. 307-325 (2010).
- 369 27.Ban-Ishihara, R. Ishihara, T. Sasaki, N. Mihara, K. & Ishihara, N. Dynamics of nucleoid  
370 structure regulated by mitochondrial fission contributes to cristae reformation and release of  
371 cytochrome c. *Proc. Natl Acad. Sci. USA* **110**, 11863-11868 (2013).
- 372 28.Ashley, N. Harris, D. & Poulton, J. Detection of mitochondrial DNA depletion in living human  
373 cells using PicoGreen staining. *Exp. Cell Res.* **303**, 432-446 (2005).
- 374 29.Arimura, S. Yamamoto, J. Aida, G. P. Nakazono, M. & Tsutsumi, N. Frequent fusion and  
375 fission of plant mitochondria with unequal nucleoid distribution. *Proc. Natl. Acad. Sci. USA*  
376 **101**, 7805-7808 (2004).
- 377 30.Sasaki, T. Sato, Y. Higashiyama, T. & Sasaki, N. Live imaging reveals the dynamics and  
378 regulation of mitochondrial nucleoids during the cell cycle in Fucci2-HeLa cells. *Sci. Rep.* **7**,  
379 11257 (2017).
- 380 31.Briggs, C. & Jones, M. SYBR Green I-induced fluorescence in cultured immune cells: A  
381 comparison with Acridine. *Acta Histochem.* **107**, 301-312 (2005).
- 382 32.Benke, A. & Manley, S. Live-cell dSTORM of cellular DNA based on direct DNA labeling.  
383 *Chembiochem* **13**, 298-301 (2012).

- 384 33.Singer, V. L. Jones, L. J. Yue, S. T. & Haugland, R. P. Characterization of PicoGreen reagent  
385 and development of a fluorescence-based solution assay for double-stranded DNA quantitation.  
386 *Anal. Biochem.* **249**, 228-238 (1997).
- 387 34.Uno, K. et al. Key structural elements of unsymmetrical cyanine dyes for highly sensitive  
388 fluorescence turn-on DNA probe. *Chem. Asian J.* **12**, 233-238 (2017).
- 389 35.Leubner, I. H. Synthesis and properties of pyrido- and azapyridocyanines. *J. Org. Chem.* **38**,  
390 1098-1102 (1973).
- 391 36.Tolbert, L. M. & Zhao, X. Beyond the cyanine limit: peierls distortion and symmetry collapse  
392 in a polymethine dye. *J. Am. Chem. Soc.* **119**, 3253-3258 (1997).
- 393 37.Breusegem, S. Y. Clegg, R. M. & Loontjens, F. G. Base-sequence specificity of Hoechst 33258  
394 and DAPI binding to five (A/T)<sub>4</sub> DNA sites with kinetic evidence for more than one high-  
395 affinity Hoechst 33258-AATT complex. *J. Mol. Biol.* **315**, 1049-1061 (2002).
- 396 38.Reus, C. Stolar, M. Vanderkley, J. Nebauer, J. & Baumgartner, T. A convenient N-arylation  
397 route for electron-deficient pyridines: the case of  $\pi$ -extended electrochromic  
398 phosphaviologens. *J. Am. Chem. Soc.* **137**, 11710-11717 (2015).
- 399 39.Albota, M. et al. Design of organic molecules with large two-photon absorption cross sections.  
400 *Science* **281**, 1653-1656 (1998).
- 401 40.Kasashima, K. Sumitani, M. & Endo, H. Human mitochondrial transcription factor A is  
402 required for the segregation of mitochondrial DNA in cultured cells. *Exp. Cell Res.* **317**, 210-  
403 220 (2011).
- 404 41.Rajala, N. Gerhold, J. M. Martinsson, P. Klymov, A. & Spelbrink, J. N. Replication factors  
405 transiently associate with mtDNA at the mitochondrial inner membrane to facilitate replication.  
406 *Nucleic Acids Res.* **42**, 952-967 (2014).
- 407 42.Jakobs, S. & Wurm, C. A. Super-resolution microscopy of mitochondria. *Curr. Opin. Chem.*  
408 *Biol.* **20**, 9-15 (2014).

- 409 43. Ježek, P. Špaček, T. Tauber, J. Pavluch, V. Mitochondrial nucleoids: superresolution  
410 microscopy analysis. *Int. J. Biochem. Cell Biol.* **106**, 21–25 (2019).
- 411 44. Kukat, C. et al. Super-resolution microscopy reveals that mammalian mitochondrial nucleoids  
412 have a uniform size and frequently contain a single copy of mtDNA. *Proc. Natl Acad. Sci.*  
413 *USA* **108**, 13534-13539 (2011).
- 414 45. Williamson, D. H. & Fennell, D. J. Visualization of yeast mitochondrial DNA with the  
415 fluorescent stain 'DAPI'. *Meth. Enzymol.* **56**, 728-733 (1979).
- 416 46. Stephan, T. Roesch, A. Riedel, D. & Jakobs, S. Live-cell STED nanoscopy of mitochondrial  
417 cristae. *Sci. Rep.* **9**, 12419 (2019).
- 418 47. Wang, C. et al. A photostable fluorescent marker for the superresolution live imaging of the  
419 dynamic structure of the mitochondrial cristae. *Proc. Natl. Acad. Sci. USA* **116**, 15817-15822  
420 (2019).
- 421 48. Zipper, H. Brunner, H. Bernhagen, J. & Vitzthum, F. Investigations on DNA intercalation and  
422 surface binding by SYBR Green I, its structure determination and methodological implications.  
423 *Nucleic Acids Res.* **32**, e103 (2004).
- 424 49. Li, Q. et al. RNA-selective, live cell imaging probes for studying nuclear structure and function.  
425 *Chem. Biol.* **13**, 615-623 (2006).
- 426 50. Digman, M. A. Caiolfa, V. R. Zamai, M. & Gratton, E. The phasor approach to fluorescence  
427 lifetime imaging analysis. *Biophys. J.* **94**, L14-L16 (2008).
- 428
- 429
- 430

431 **Acknowledgements**

432 We are deeply grateful to Prof. K. Itami, Prof. and Prof. T. Higashiyama at Nagoya University  
433 for enormous help of this work such as invaluable comments, discussion and financial support.  
434 We thank Dr. H. Ito, Dr. Y. Segawa, Dr. T. Fujikawa and Dr. K. Kato at Nagoya University for  
435 many helpful comments. We also thank M. Tsuzuki (Nagoya University) for supporting cell  
436 culture and cell toxicity assessment. This work was supported by Grant-in-Aid for JSPS  
437 Research Fellow (14J03652 to K.U.), Japan Society for Scientific Research (19H05364,  
438 20H05412 to Y.S., 16H06464, 16K21727, JP16H06280 to T.H), Toyoaki scholarship  
439 Foundation and Ohsumi Frontier Science Foundation to Y.S. and the ERATO program from  
440 JST (JPMJER1302 to K.I.).

441

442 **Author contributions**

443 K.U. and Y.S. conceived and designed this research. K.U. performed synthesis of all PC dyes and  
444 most of the spectroscopic measurements. Y.S. and N.S. performed fluorescence titration  
445 experiments using hairpin oligonucleotides and all imaging experiments. U.K. and Y.S. wrote the  
446 manuscript. All authors read and approved the manuscript.

447

448 **Competing interests**

449 The patent application, “Cyanine compounds and fluorophores” (JP 2019-14849) invented by  
450 Y.S. and K.U. was has been published.

451

452 **Additional information Supplementary information is available for this paper at**

453 **[https://doi.org/\\*\\*\\*\\*\\*](https://doi.org/*****)**

454

455 **Table 1. Photophysical properties of all synthesized N-aryl PC derivatives.**

| Name | $\lambda_{\text{abs}}^{\text{dsDNA}}/\text{nm}$ <sup>(a)</sup><br>( $\lambda_{\text{abs}}^{\text{free}}/\text{nm}$ ) <sup>(b)</sup> | $\epsilon^{\text{dsDNA}}/10^4$<br>$\text{M}^{-1}\text{cm}^{-1}$ <sup>(c)</sup> | $\lambda_{\text{em}}^{\text{dsDNA}}/\text{nm}$ <sup>(d)</sup><br>( $\lambda_{\text{em}}^{\text{free}}/\text{nm}$ ) <sup>(e)</sup> | $\Phi_{\text{F}}^{\text{dsDNA(f)}}$<br>$\Phi_{\text{F}}^{\text{free (g)}}$ | $I^{\text{dsDNA}}$<br>$/I^{\text{free (h)}}$ | $I^{\text{RNA}}$<br>$/I^{\text{free (i)}}$ | $I^{\text{dsDNA}}$<br>$/I^{\text{RNA (j)}}$ | $\tau^{\text{dsDNA}}$<br>$/\text{ns}$ <sup>(k)</sup> |
|------|-------------------------------------------------------------------------------------------------------------------------------------|--------------------------------------------------------------------------------|-----------------------------------------------------------------------------------------------------------------------------------|----------------------------------------------------------------------------|----------------------------------------------|--------------------------------------------|---------------------------------------------|------------------------------------------------------|
| PC1  | 532 (510)                                                                                                                           | 14                                                                             | 546 (535)                                                                                                                         | 0.09<br>(0.0004)                                                           | 1600                                         | 110                                        | 14                                          | 0.62                                                 |
| PC2  | 536 (512)                                                                                                                           | 13                                                                             | 553 (537)                                                                                                                         | 0.22<br>(0.0006)                                                           | 2500                                         | 170                                        | 15                                          | 0.86                                                 |
| PC3  | 552 (520)                                                                                                                           | 8.6                                                                            | 600 (592)                                                                                                                         | 0.42<br>(0.0018)                                                           | 3900                                         | 130                                        | 31                                          | 1.5                                                  |
| PC4  | 561 (524)                                                                                                                           | 7.7                                                                            | 612 (605)                                                                                                                         | 0.44<br>(0.0026)                                                           | 1700                                         | 53                                         | 32                                          | n.d.                                                 |
| PC5  | 654 (630)                                                                                                                           | 15                                                                             | 666 (652)                                                                                                                         | 0.4<br>(0.039)                                                             | 140                                          | 25                                         | 5.7                                         | 2.7                                                  |
| PC6  | 671 (639)                                                                                                                           | 10                                                                             | 695 (666)                                                                                                                         | 0.26<br>(0.038)                                                            | 54                                           | 2.1                                        | 26                                          | 1.7                                                  |
| PC7  | 674 (642)                                                                                                                           | 9.6                                                                            | 700 (683)                                                                                                                         | 0.20<br>(0.038)                                                            | 57                                           | 2.3                                        | 25                                          | 1.8                                                  |
| PC8  | 662 (637)                                                                                                                           | 9.7                                                                            | 678 (666)                                                                                                                         | 0.33<br>(0.075)                                                            | 39                                           | 20                                         | 2                                           | 2.3                                                  |

456

457 Tris-EDTA buffer solution (TE buffer, pH 8.0) was used for all optical measurements. <sup>(a)</sup>  
 458 Maximum absorption wavelength of dye-dsDNA complexes. <sup>(b)</sup> Maximum absorption wavelength  
 459 of dyes in their free states. <sup>(c)</sup> Molar absorption coefficient of dye-dsDNA complexes. <sup>(d)</sup> Maximum  
 460 fluorescence wavelength of dye-dsDNA complexes and <sup>(e)</sup> maximum fluorescence wavelength of  
 461 free dyes. <sup>(f)</sup> Fluorescence quantum yields of dye-dsDNA complexes and <sup>(g)</sup> fluorescence quantum  
 462 yield in their free states. <sup>(h)(i)</sup> Ratio of fluorescence increases of each dye upon binding to dsDNA  
 463 and RNA; see the SI for the detailed changes in fluorescence spectra. <sup>(j)</sup> The value of calculated  
 464 DNA/RNA selectivity (see main text). <sup>(k)</sup> Fluorescence lifetime of dye-dsDNA complexes.

465

466 **Figure Legends**

467 **Figure 1. Molecular design and in vitro characterization of N-aryl PC derivatives.** a) The  
468 structure and structural components of **PC1**, b) The comparison of DNA/RNA selectivity of **PC1**,  
469 Hoechst 33342, and Pico-Green, c) The titration curve of 100 nM **PC1** with various concentration  
470 of hair-pin oligonucleotides. The error bars indicate means  $\pm$  s.d. of three independent replicates.  
471 d) The general structure of PC dyes and their substituent patters with corresponding compound  
472 names; the unit of methylene length and N-aryl groups are represented as “n” and “R” respectively.  
473 The normalized absorption (e) and fluorescence spectra (f) of all PC dyes when complexed with  
474 calf thymus double stranded DNA (dsDNA) in tris-EDTA buffer solution. (pH= 8.0); see details  
475 in Fig. S1 and Fig. S2.

476

477 **Figure 2. Live cell imaging with PC1 and PC3.** (a) Live cell fluorescent microscopy with **PC1**,  
478 **PC3** and commercialized red fluorescent DNA dyes. HeLa cells were stained with each dye at  
479 100 nM. Images are maximum z-projections of total planes (1- $\mu$ m intervals) (b) Quantification  
480 of cell proliferation rate of cells stained with DNA labeling dyes. HeLa cells were stained with  
481 each dye at 30 nM and observed every 5 min with z-sectioning (6 frames at 3  $\mu$ m steps) for 24 h.  
482 The proliferation rate was quantified as fold changes based on the number of cells between the  
483 first frame (0 h) and the last frame (24 h) of bright-field images. Black bars indicate the results  
484 from only bright-field time-lapse imaging without fluorescent time-lapse imaging and white bars  
485 indicate the results from both bright-field and fluorescent time-lapse imaging. Error bar shows  
486 mean  $\pm$  s.d. from three independent biological replicates (>26 cells per replicate). Statistical  
487 significance (p-value <0.01) of difference from control condition was examined by two-sided  
488 student t-test. (c) Live cell fluorescent images of different culture cell types with 500 nM **PC1**  
489 and **PC3**. The images are maximum z-projections of total planes (1  $\mu$ m intervals) (d) Live cell  
490 fluorescent images of Arabidopsis leaf and root cells with 1  $\mu$ M **PC1** and **PC3**. The images are

491 maximum z-projections of total planes (1.1  $\mu\text{m}$  intervals) (e) Comparison of imaging penetration  
492 for single and two-photon excitation microscopy in Arabidopsis root tip stained with 1  $\mu\text{M}$  **PC1**.  
493 Images were shown every 10  $\mu\text{m}$  steps from z-sectioning images at 1  $\mu\text{m}$  interval. (f) Time-lapse  
494 observation by two-photon microscopy excited with 1000 nm in Arabidopsis root stained with 5  
495  $\mu\text{M}$  **PC1**. Root tip was observed every 2 min with z-sectioning (50 frames at 2  $\mu\text{m}$  steps).

496

497 **Figure 3. Discrimination between nuclear DNA and mt-DNA with fluorescence lifetime of**  
498 **PC1.** (a-c) Concentration dependence of staining pattern with **PC1**. (a) 10 nM, (b) 1 nM, (c) 100  
499 pM. The images are maximum z-projections of total planes (0.3  $\mu\text{m}$  intervals). (d-l) Fluorescent  
500 intensity images (d, g, j) and FLIM based separation images of nuclear DNA and mitochondrial  
501 DNA (e, h, k) by phasor plot analysis (f, i, l). The pseudo colors of (e, h, k) is correspond to the  
502 colors of circles in (f, i, l). The nuclear DNA, mt-DNA, and ch-DNA are shown in red, cyan, and  
503 yellow, respectively. HeLa cells (d-f) and NIH3T3 (g-i) were stained with 1 nM and 10 nM **PC1**,  
504 respectively and the fluorescent spectrum were collected between 540-650 nm excited at 532 nm.  
505 Stomata in Arabidopsis leaf cells was stained with 300 nM **PC1** and excited at 532 nm. The  
506 fluorescent spectrum of **PC1** and chlorophyll autofluorescence were collected between 540-620  
507 nm and 680-700 nm shown in green and magenta in (k), respectively.

508

509 **Figure 4. Comparison of confocal and STED-FIIM imaging in living HeLa cells stained with**  
510 **PC3.** (a) Confocal and STED-FLIM images of mt-DNA stained with 10 nM **PC3** in living HeLa  
511 cells. (b) Enlarged images of the white dotted square region of (a). (c) An example of normalized  
512 fluorescence intensity profiles obtained from the region between arrows in (b). Line profiles in  
513 STED and confocal image are shown in black and gray, respectively. FWHM values estimated by  
514 fitting with a Gaussian function are also indicated in the black line profile. (d) Box plot of FWHM  
515 value as a function of delay time in the minor axis of mt-nucleoids (n=15 from independent cells).



516 **Figure 1**

517

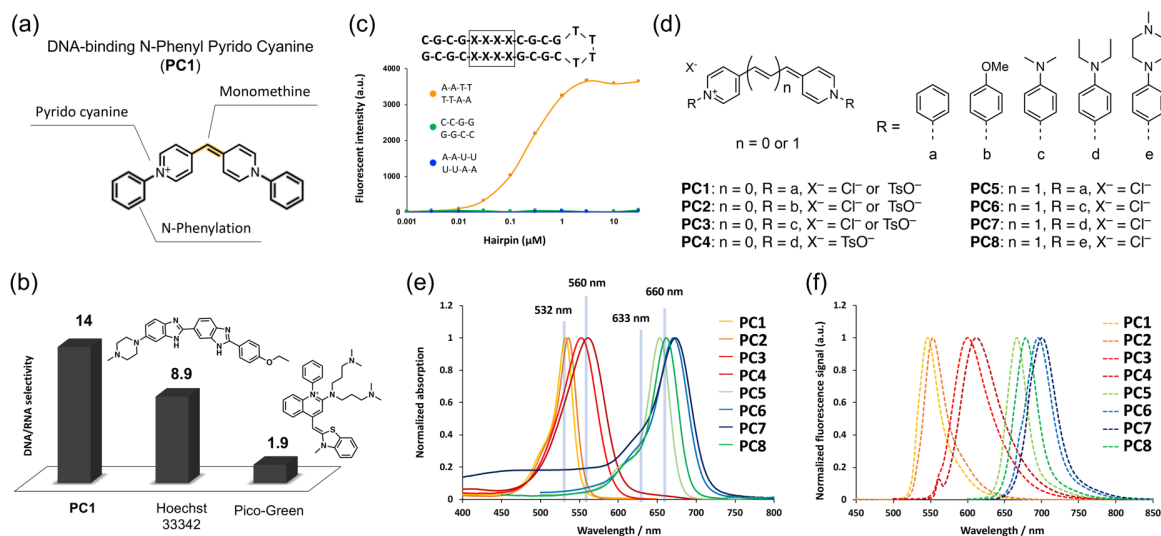

518

519

520

521

522

523

524

525

526

**Figure 1. Molecular design and in vitro characterization of N-aryl PC derivatives.** a) The structure and structural components of PC1, b) The comparison of DNA/RNA selectivity of PC1, Hoechst 33342, and Pico-Green, c) The titration curve of 100 nM PC1 with various concentration of hair-pin oligonucleotides. The error bars indicate means  $\pm$  s.d. of three independent replicates. d) The general structure of PC dyes and their substituent patterns with corresponding compound names; the unit of methylene length and N-aryl groups are represented as “n” and “R” respectively. The normalized absorption (e) and fluorescence spectra (f) of all PC dyes when complexed with calf thymus double stranded DNA (dsDNA) in tris-EDTA buffer solution. (pH= 8.0); see details in Fig. S1 and Fig. S2.

527 **Figure 2.**

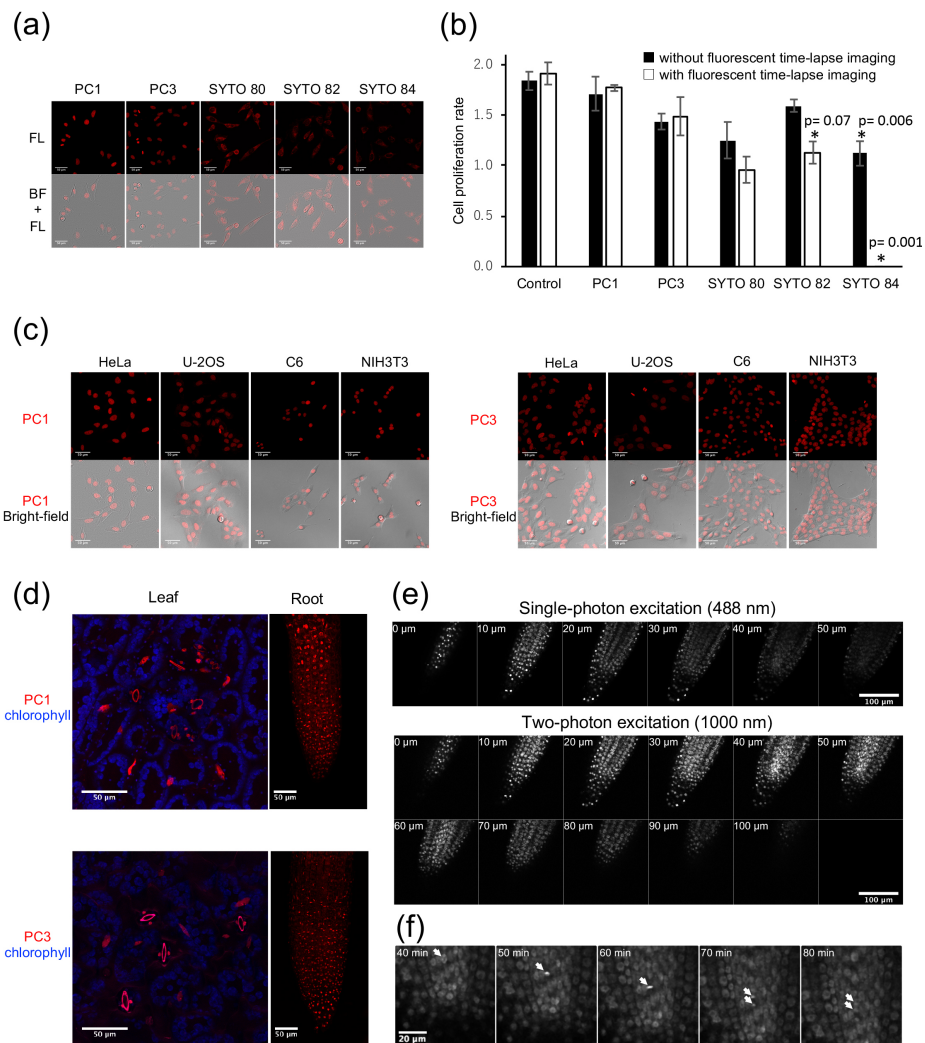

528

529 **Figure 2. Live cell imaging with PC1 and PC3.** (a) Live cell fluorescent microscopy with PC1, PC3 and  
 530 commercialized red fluorescent DNA dyes. HeLa cells were stained with each dye at 100 nM. Images are maximum z-  
 531 projections of total planes (1-μm intervals) (b) Quantification of cell proliferation rate of cells stained with DNA  
 532 labeling dyes. HeLa cells were stained with each dye at 30 nM and observed every 5 min with z-sectioning (6 frames  
 533 at 3 μm steps) for 24 h. The proliferation rate was quantified as fold changes based on the number of cells between the  
 534 first frame (0 h) and the last frame (24 h) of bright-field images. Black bars indicate the results from only bright-field  
 535 time-lapse imaging without fluorescent time-lapse imaging and white bars indicate the results from both bright-field  
 536 and fluorescent time-lapse imaging. Error bar shows mean ± s.d. from three independent biological replicates (>26  
 537 cells per replicate). Statistical significance (p-value <0.01) of difference from control condition was examined by two-  
 538 sided student t-test. (c) Live cell fluorescent images of different culture cell types with 500 nM PC1 and PC3. The  
 539 images are maximum z-projections of total planes (1 μm intervals) (d) Live cell fluorescent images of Arabidopsis leaf  
 540 and root cells with 1 μM PC1 and PC3. The images are maximum z-projections of total planes (1.1 μm intervals) (e)  
 541 Comparison of imaging penetration for single and two-photon excitation microscopy in Arabidopsis root tip stained  
 542 with 1 μM PC1. Images were shown every 10 μm steps from z-sectioning images at 1 μm interval. (f) Time-lapse  
 543 observation by two-photon microscopy excited with 1000 nm in Arabidopsis root stained with 5 μM PC1. Root tip was  
 544 observed every 2 min with z-sectioning (50 frames at 2 μm steps).

545

546 **Figure 3.**

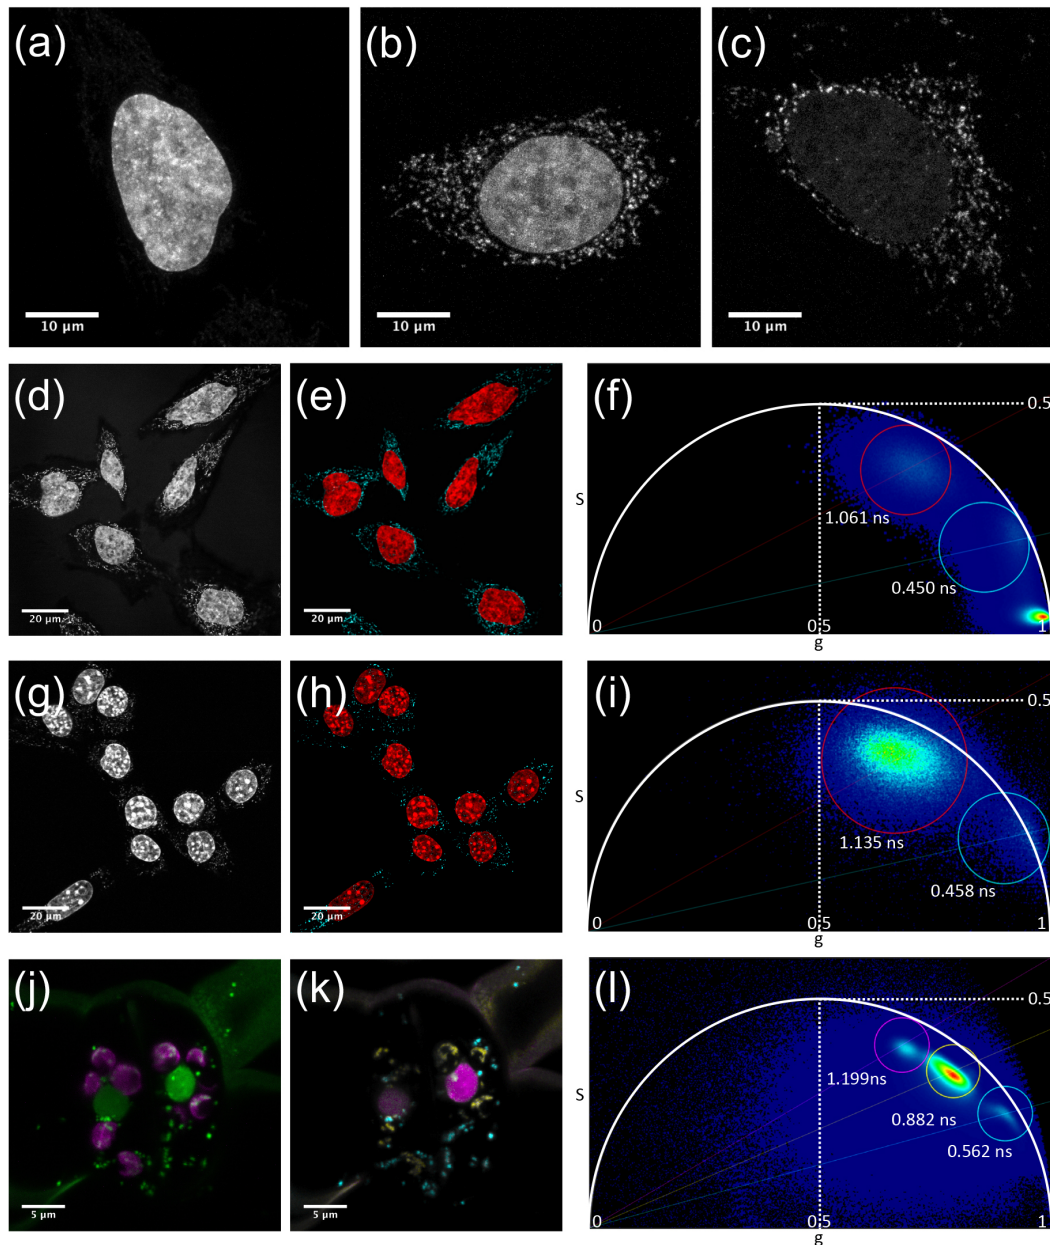

547

548 **Figure 3. Discrimination between nuclear DNA and mt-DNA with fluorescence lifetime of PC1.** (a-c)  
549 Concentration dependence of staining pattern with **PC1**. (a) 10 nM, (b) 1 nM, (c) 100 pM. The images are maximum  
550 z-projections of total planes (0.3  $\mu$ m intervals). (d-l) Fluorescent intensity images (d, g, j) and FLIM based separation  
551 images of nuclear DNA and mitochondrial DNA (e, h, k) by phasor plot analysis (f, i, l). The pseudo colors of (e, h, k)  
552 is correspond to the colors of circles in (f, i, l). The nuclear DNA, mt-DNA, and ch-DNA are shown in red, cyan, and  
553 yellow, respectively. HeLa cells (d-f) and NIH3T3 (g-i) were stained with 1 nM and 10 nM **PC1**, respectively and the  
554 fluorescent spectrum were collected between 540-650 nm excited at 532 nm. Stomata in Arabidopsis leaf cells was  
555 stained with 300 nM **PC1** and excited at 532 nm. The fluorescent spectrum of **PC1** and chlorophyll autofluorescence  
556 were collected between 540-620 nm and 680-700 nm shown in green and magenta in (k), respectively.  
557

558 **Figure 4.**

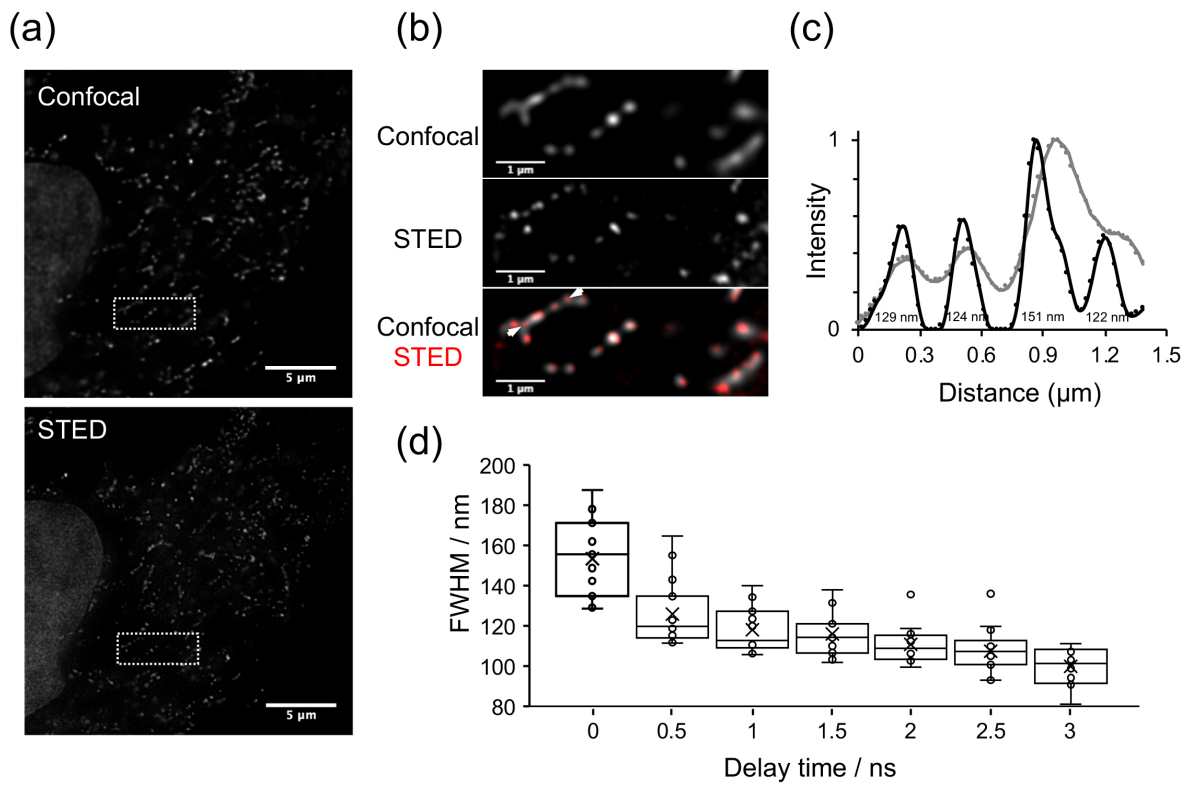

559

560 **Figure 4. Comparison of confocal and STED-FIIM imaging in living HeLa cells stained with PC3.** (a) Confocal  
561 and STED-FLIM images of mt-DNA stained with 10 nM PC3 in living HeLa cells. (b) Enlarged images of the white  
562 dotted square region of (a). (c) An example of normalized fluorescence intensity profiles obtained from the region  
563 between arrows in (b). Line profiles in STED and confocal image are shown in black and gray, respectively. FWHM  
564 values estimated by fitting with a Gaussian function are also indicated in the black line profile. (d) Box plot of FWHM  
565 value as a function of delay time in the minor axis of mt-nucleoids (n=15 from independent cells).  
566

567
